# Supplementary material for: Synthesis and luminescence properties of Yb3+/Er3+-doped Bi2(MoO4)3−z(WO4)z phosphors for optical thermometry
Source: Royal Society of Chemistry journal article supplement (doi:10.1039/d4ce00336e), 2024-01-01
Supplement: d4ce00336e1.pdf [file d4ce00336e1.pdf]

## Supporting Information

### Synthesis and luminescence properties of Yb<sup>3+</sup>/Er<sup>3+</sup>-doped Bi<sub>2</sub>(MoO<sub>4</sub>)<sub>3-z</sub>(WO<sub>4</sub>)<sub>z</sub> phosphors for optical thermometry

Huimin Du, Yanyang Li, Mengran Ouyang, Meifang Liu, Shanshan Hu\* and Jun Yang\*

*School of Chemistry and Chemical Engineering, Southwest University, No. 2 Tiansheng Road, Beibei District, Chongqing 400715, China.*

*E-mail: jyang@swu.edu.cn, hushan3@swu.edu.cn*

**Table. S1** The unit cell parameters of Rietveld refined Bi<sub>2</sub>(MoO<sub>4</sub>)<sub>3</sub> and Bi<sub>2</sub>(MoO<sub>4</sub>)<sub>3</sub>: y% Yb<sup>3+</sup>, 3%Er<sup>3+</sup> (y = 2, 6, 10, 14, 18) samples

| Compound                   | Bi <sub>2</sub> (MoO <sub>4</sub> ) <sub>3</sub> | Bi <sub>2</sub> (MoO <sub>4</sub> ) <sub>3</sub> :<br>2%Yb <sup>3+</sup> ,<br>3%Er <sup>3+</sup> | Bi <sub>2</sub> (MoO <sub>4</sub> ) <sub>3</sub> :<br>6%Yb <sup>3+</sup> ,<br>3%Er <sup>3+</sup> | Bi <sub>2</sub> (MoO <sub>4</sub> ) <sub>3</sub> :<br>10%Yb <sup>3+</sup> ,<br>3%Er <sup>3+</sup> | Bi <sub>2</sub> (MoO <sub>4</sub> ) <sub>3</sub> :<br>14%Yb <sup>3+</sup> ,<br>3%Er <sup>3+</sup> | Bi <sub>2</sub> (MoO <sub>4</sub> ) <sub>3</sub> :<br>18%Yb <sup>3+</sup> ,<br>3%Er <sup>3+</sup> |
|----------------------------|--------------------------------------------------|--------------------------------------------------------------------------------------------------|--------------------------------------------------------------------------------------------------|---------------------------------------------------------------------------------------------------|---------------------------------------------------------------------------------------------------|---------------------------------------------------------------------------------------------------|
|                            | Space group                                      | P121/n1                                                                                          | P121/n1                                                                                          | P121/n1                                                                                           | P121/n1                                                                                           | P121/n1                                                                                           |
| <i>a</i> , Å               | 7.71801                                          | 7.71129                                                                                          | 7.70086                                                                                          | 7.69583                                                                                           | 7.69497                                                                                           | 7.69048                                                                                           |
| <i>b</i> , Å               | 11.51745                                         | 11.50829                                                                                         | 11.4904                                                                                          | 11.48587                                                                                          | 11.48534                                                                                          | 11.47907                                                                                          |
| <i>c</i> , Å               | 11.12542                                         | 11.11645                                                                                         | 11.10031                                                                                         | 11.09568                                                                                          | 11.09396                                                                                          | 11.08842                                                                                          |
| <i>V</i> , Å <sup>3</sup>  | 962.097                                          | 959.721                                                                                          | 955.546                                                                                          | 954.089                                                                                           | 953.833                                                                                           | 952.255                                                                                           |
| <i>Z</i>                   | 4                                                | 4                                                                                                | 4                                                                                                | 4                                                                                                 | 4                                                                                                 | 4                                                                                                 |
| 2θ-range, °                | 10°-60°                                          | 10°-60°                                                                                          | 10°-60°                                                                                          | 10°-60°                                                                                           | 10°-60°                                                                                           | 10°-60°                                                                                           |
| <i>R</i> <sub>wp</sub> , % | 10.481                                           | 10.991                                                                                           | 11.514                                                                                           | 10.412                                                                                            | 12.584                                                                                            | 10.349                                                                                            |
| <i>X</i> <sup>2</sup>      | 2.40                                             | 2.50                                                                                             | 2.68                                                                                             | 2.53                                                                                              | 3.01                                                                                              | 2.37                                                                                              |

**Table. S2** The integrated intensity of green and red upconversion emission of  $\text{Bi}_2(\text{MoO}_4)_3:14\%\text{Yb}^{3+}, 3\%\text{Er}^{3+}$  at different pump powers

| pump power (mW) | The integral intensity of green light region(cps) | The integral intensity of red light region (cps) |
|-----------------|---------------------------------------------------|--------------------------------------------------|
| 557             | 334322.33                                         | 43331.72                                         |
| 700             | 513599.52                                         | 57493.51                                         |
| 859             | 745642.50                                         | 79137.11                                         |
| 1006            | 984747.75                                         | 98267.58                                         |
| 1150            | 1279955.68                                        | 122907.75                                        |
| 1519            | 2017475.40                                        | 189164.15                                        |
| 1883            | 2711036.24                                        | 255322.67                                        |
| 2160            | 3438089.83                                        | 322904.36                                        |

**Table. S3** The fluorescence lifetimes of  $^2\text{H}_{11/2}$  (530 nm),  $^4\text{S}_{3/2}$  (552 nm) and  $^4\text{F}_{9/2}$  (659 nm) energy levels under the excitation of 980 nm light source in  $\text{Bi}_2(\text{MoO}_4)_3: y\%\text{Yb}^{3+}, 3\%\text{Er}^{3+}$  (y=2, 6, 10, 14, 18) phosphors

| Energy level        | $\text{Bi}_2(\text{MoO}_4)_3:y\%\text{Yb}^{3+}, 3\%\text{Er}^{3+}$ |                     |                     |                     |                     |
|---------------------|--------------------------------------------------------------------|---------------------|---------------------|---------------------|---------------------|
|                     | y=2                                                                | y=6                 | y=10                | y=14                | y=18                |
| $^2\text{H}_{11/2}$ | 30.49 $\mu\text{s}$                                                | 34.53 $\mu\text{s}$ | 48.58 $\mu\text{s}$ | 63.40 $\mu\text{s}$ | 48.87 $\mu\text{s}$ |
| $^4\text{S}_{3/2}$  | 29.23 $\mu\text{s}$                                                | 31.78 $\mu\text{s}$ | 43.82 $\mu\text{s}$ | 59.44 $\mu\text{s}$ | 43.25 $\mu\text{s}$ |
| $^4\text{F}_{9/2}$  | 22.30 $\mu\text{s}$                                                | 23.85 $\mu\text{s}$ | 30.40 $\mu\text{s}$ | 33.20 $\mu\text{s}$ | 22.68 $\mu\text{s}$ |
